# Supplementary material for: Evaluation of Patient Experiences Regarding Pharmacist-Administrated Vaccination and Attitude towards Future Additional Pharmacy Services in Poland
Source: MDPI journal article supplement (doi:10.3390/vaccines10091479), 2022-09-06
Supplement: s1 [file s1]

**Table S1.** The survey questionnaire

| Questions                                                                                                        | Answers                                                                                                                                                                                                                 |
|------------------------------------------------------------------------------------------------------------------|-------------------------------------------------------------------------------------------------------------------------------------------------------------------------------------------------------------------------|
| Why did you decided to get vaccinated at the pharmacy                                                            |                                                                                                                                                                                                                         |
| 1. The pharmacy was the only vaccination site available to me when I wanted to                                   | <ul style="list-style-type: none"> <li>• Yes</li> <li>• No</li> <li>• I have no opinion</li> </ul>                                                                                                                      |
| 2. I have problems with access to my GP                                                                          | <ul style="list-style-type: none"> <li>• Yes</li> <li>• No</li> <li>• I have no opinion</li> </ul>                                                                                                                      |
| 3. The opening hours of the pharmacy are fine for me                                                             | <ul style="list-style-type: none"> <li>• Yes</li> <li>• No</li> <li>• I have no opinion</li> </ul>                                                                                                                      |
| 4. The pharmacy is easily accessible to me (e.g. proximity to home / work, parking, public transport connection) | <ul style="list-style-type: none"> <li>• Yes</li> <li>• No</li> <li>• I have no opinion</li> </ul>                                                                                                                      |
| 5. I have already good experiences with the pharmacy service and I trust the pharmacists                         | <ul style="list-style-type: none"> <li>• Yes</li> <li>• No</li> <li>• I have no opinion</li> </ul>                                                                                                                      |
| Different vaccination aspects                                                                                    |                                                                                                                                                                                                                         |
| 6. How did you arrange the vaccination at the pharmacy:                                                          | <ul style="list-style-type: none"> <li>• I registered electronically via e-registration, patient gov.pl</li> <li>• I used the 24/7 helpline 989</li> <li>• in person during a visit to the pharmacy or phone</li> </ul> |
| 7. I am satisfied with the interview before the COVID-19 vaccination at the pharmacy.                            | <ul style="list-style-type: none"> <li>• Yes</li> <li>• No</li> <li>• I have no opinion</li> </ul>                                                                                                                      |
| 8. I am satisfied with the information I have received from the pharmacy prior to the vaccination                | <ul style="list-style-type: none"> <li>• Yes</li> <li>• No</li> <li>• I have no opinion</li> </ul>                                                                                                                      |
| 9. I am satisfied with the technique of vaccination in the pharmacy                                              | <ul style="list-style-type: none"> <li>• Yes</li> <li>• No</li> </ul>                                                                                                                                                   |

|                                                                                               |                                                                                                    |
|-----------------------------------------------------------------------------------------------|----------------------------------------------------------------------------------------------------|
|                                                                                               | <ul style="list-style-type: none"> <li>• I have no opinion</li> </ul>                              |
| 10. I am satisfied with the premises that have been organized in the pharmacy for vaccination | <ul style="list-style-type: none"> <li>• Yes</li> <li>• No</li> <li>• I have no opinion</li> </ul> |
| 11. I am satisfied with the post-vaccination care in the pharmacy                             | <ul style="list-style-type: none"> <li>• Yes</li> <li>• No</li> <li>• I have no opinion</li> </ul> |

Summary of pharmacist-administrated vaccination

|                                                                                      |                                                                                                    |
|--------------------------------------------------------------------------------------|----------------------------------------------------------------------------------------------------|
| 12. I felt safe throughout the vaccination procedure at the pharmacy                 | <ul style="list-style-type: none"> <li>• Yes</li> <li>• No</li> <li>• I have no opinion</li> </ul> |
| 13. I believe pharmacists are competent to administer the vaccine                    | <ul style="list-style-type: none"> <li>• Yes</li> <li>• No</li> <li>• I have no opinion</li> </ul> |
| 14. I am glad that I got vaccinated against COVID at the pharmacy                    | <ul style="list-style-type: none"> <li>• Yes</li> <li>• No</li> <li>• I have no opinion</li> </ul> |
| 15. I would come to the pharmacy for another vaccination (not only against COVID-19) | <ul style="list-style-type: none"> <li>• Yes</li> <li>• No</li> <li>• I have no opinion</li> </ul> |

Pharmaceutical care

|                                                                      |                                                                       |
|----------------------------------------------------------------------|-----------------------------------------------------------------------|
| 16. What other services do you want to be available at the pharmacy? | <ul style="list-style-type: none"> <li>• Yes</li> <li>• No</li> </ul> |
| 1. Ability to control blood pressure                                 |                                                                       |
| 2. Ability to control glucose levels                                 |                                                                       |
| 3. Ability to measure weight and height and calculate BMI            |                                                                       |

|                                                                                                                                                                                                                                                                                                                                                                                                                                                                                                             |  |
|-------------------------------------------------------------------------------------------------------------------------------------------------------------------------------------------------------------------------------------------------------------------------------------------------------------------------------------------------------------------------------------------------------------------------------------------------------------------------------------------------------------|--|
| 4. Possibility of advice from a pharmacist about specialized diets, e.g. slimming diets, lowering cholesterol, diabetic diets, diets for stomach diseases, etc.<br>5. Training sessions on the operation of medical equipment such as insulin pens, glucometers and inhalers<br>6. Advice and control of quitting smoking<br>7. Possibility to continue ongoing prescriptions by pharmacists<br>8. Monitoring of the course of therapy (well-being, occurrence of side effects) with newly introduced drugs |  |
|-------------------------------------------------------------------------------------------------------------------------------------------------------------------------------------------------------------------------------------------------------------------------------------------------------------------------------------------------------------------------------------------------------------------------------------------------------------------------------------------------------------|--|

Demographic data

|                               |                                                                                                                                                                   |
|-------------------------------|-------------------------------------------------------------------------------------------------------------------------------------------------------------------|
| 17. Age                       | in years .....                                                                                                                                                    |
| 18. Sex                       | <ul style="list-style-type: none"> <li>• Woman</li> <li>• Man</li> </ul>                                                                                          |
| 19. Voivodeship               | in years .....                                                                                                                                                    |
| 20. Place of residence        | <ul style="list-style-type: none"> <li>• City with more than 100,000 inhabitants</li> <li>• City with less than 100,000 inhabitants</li> <li>• Village</li> </ul> |
| 21. Education                 | <ul style="list-style-type: none"> <li>• Primary</li> <li>• Secondary vocational</li> <li>• Secondary general</li> <li>• Higher</li> </ul>                        |
| 22. What vaccine did you get? | <ul style="list-style-type: none"> <li>• Pfizer-BioNTech</li> <li>• AstraZeneca</li> <li>• Moderna</li> <li>• Johnson &amp; Johnson</li> </ul>                    |
| 23. Which dose of vaccine?    | <ul style="list-style-type: none"> <li>• 1<sup>st</sup></li> <li>• 2<sup>nd</sup></li> <li>• 3<sup>rd</sup></li> </ul>                                            |

**Table S2.** The reasons for getting vaccinated against COVID-19 at a pharmacy in relation to basic characteristics of participants.

|                           | The pharmacy was the only vaccination site available |              |                 |                                                                         | Problems with access to my clinic |                 |          | The opening hours of the pharmacy are fine |                 |          | The pharmacy is easily accessible |                 |                   | I already have good experiences with the pharmacy service |                 |                             |
|---------------------------|------------------------------------------------------|--------------|-----------------|-------------------------------------------------------------------------|-----------------------------------|-----------------|----------|--------------------------------------------|-----------------|----------|-----------------------------------|-----------------|-------------------|-----------------------------------------------------------|-----------------|-----------------------------|
|                           | Total                                                | Yes          | <i>p</i> -value | OR 95%CI                                                                | Yes                               | <i>p</i> -value | OR 95%CI | Yes                                        | <i>p</i> -value | OR 95%CI | Yes                               | <i>p</i> -value | OR 95%CI          | Yes                                                       | <i>p</i> -value | OR 95%CI                    |
| Sex                       |                                                      |              |                 |                                                                         |                                   |                 |          |                                            |                 |          |                                   |                 |                   |                                                           |                 |                             |
| Female                    | 226                                                  | 96 (42.48%)  | 0.733           | -                                                                       | 63 (27.88%)                       | 0.147           | -        | 216 (95.58%)                               | 0.708*          | -        | 215 (95.13%)                      | 0.372*          | -                 | 170 (75.22%)                                              | 0.855           | -                           |
| Male                      | 172                                                  | 76 (44.19 %) |                 |                                                                         | 37 (21.51%)                       |                 |          | 163 (94.77%)                               |                 |          | 160 (93.02%)                      |                 |                   | 128 (74.42%)                                              |                 |                             |
| Age                       |                                                      |              |                 |                                                                         |                                   |                 |          |                                            |                 |          |                                   |                 |                   |                                                           |                 |                             |
| G1                        | 171                                                  | 60 (35.09%)  | 0.001           | ref.<br>1.37<br>(0.85-2.21)                                             | 39 (22.81%)                       | 0.634           | -        | 164 (95.91%)                               | 0.789           | -        | 168 (98.25%)                      | 0.008           | 6.22 (1.72-22.56) | 112 (65.5%)                                               | 0.0002          | ref.<br>1.81<br>(1.06-3.09) |
| G2                        | 120                                                  | 51 (42.5%)   |                 |                                                                         | 33 (27.5%)                        |                 |          | 113 (94.17%)                               |                 |          | 108 (90%)                         |                 | ref. (77.5%)      | 93 (77.5%)                                                |                 |                             |
| G3                        | 107                                                  | 61 (57.01%)  |                 |                                                                         | 28 (26.17%)                       |                 |          | 102 (95.63%)                               |                 |          | 99 (92.52%)                       |                 | 1.37 (0.54-3.5)   | 93 (86.92%)                                               |                 | 3.5 (1.84-6.67)             |
| Place of residence        |                                                      |              |                 |                                                                         |                                   |                 |          |                                            |                 |          |                                   |                 |                   |                                                           |                 |                             |
| city above 100.000        | 206                                                  | 80 (39.02%)  | 0.109           | -                                                                       | 49 (23.9%)                        | 0.434           | -        | 197 (96.1%)                                | 0.688           | -        | 192 (93.66%)                      | 0.006           | 2.46 (0.93-6.54)  | 144 (70.24%)                                              | 0.015           | 1.04 (0.53-2.05)            |
| city of less than 100.000 | 143                                                  | 64 (44.76%)  |                 |                                                                         | 35 (24.48%)                       |                 |          | 135 (94.41%)                               |                 |          | 140 (97.9%)                       |                 | 7.78 (1.93-31.41) | 119 (83.22%)                                              |                 | 2.19 (1.03-4.63)            |
| rural                     | 49                                                   | 27 (55.1%)   |                 |                                                                         | 16 (32.65%)                       |                 |          | 46 (93.88%)                                |                 |          | 42 (85.71%)                       |                 | ref. (69.39%)     | ref.                                                      |                 |                             |
| Education                 |                                                      |              |                 |                                                                         |                                   |                 |          |                                            |                 |          |                                   |                 |                   |                                                           |                 |                             |
| Higher Secondary          | 162                                                  | 50 (30.86%)  | 0.000           | ref.<br>1.84<br>(1.16-2.89)<br>3.36<br>(1.74-6.48)<br>8.51<br>(3-24.08) | 36 (22.22%)                       | 0.675           | -        | 153 (94.44%)                               | 0.614           | -        | 153 (94.44%)                      | 0.339           | -                 | 118 (72.84%)                                              | 0.427           | -                           |
| general                   | 162                                                  | 73 (45.06%)  |                 |                                                                         | 43 (26.54%)                       |                 |          | 155 (95.68%)                               |                 |          | 152 (93.83%)                      |                 |                   | 121 (74.69%)                                              |                 |                             |
| Secondary vocational      | 50                                                   | 30 (60%)     |                 |                                                                         | 15 (30%)                          |                 |          | 49 (98%)                                   |                 |          | 49 (98%)                          |                 |                   | 42 (84%)                                                  |                 |                             |
| Primary                   | 24                                                   | 19 (79.17%)  |                 |                                                                         | 6 (25%)                           |                 |          | 22 (91.67%)                                |                 |          | 21 (87.5%)                        |                 |                   | 17 (70.83%)                                               |                 |                             |

|         |     |              |       |   |          |       |   |          |       |              |          |       |             |          |       |
|---------|-----|--------------|-------|---|----------|-------|---|----------|-------|--------------|----------|-------|-------------|----------|-------|
| Vaccine |     |              |       |   |          |       |   |          |       |              |          |       |             |          |       |
| dose    |     |              |       |   |          |       |   |          |       |              |          |       |             |          |       |
| 1st     | 30  | 19 (63.33%)  |       |   | 12 (40%) |       |   | 26       |       | ref.         | 27 (90%) |       | 1.38        | 24 (80%) |       |
|         |     |              |       |   |          |       |   | (86.67%) |       |              |          |       | (0.34-5.65) |          |       |
| 2nd     | 60  | 27 (45%)     | 0.058 | - | 13       | 0.135 | - | 55       | 0.017 | 1.69         | 52       | 0.009 | ref.        | 48 (80%) | 0.444 |
|         |     |              |       |   | (21.67%) |       |   | (91.67%) |       | (0.42-6.83)  | (86.67%) |       |             |          | -     |
|         |     |              |       |   | 75       |       |   | 298      |       | 4.58         | 296      |       | 3.79        | 226      |       |
| 3rd     | 308 | 126 (40.91%) |       |   | (24.35%) |       |   | (96.75%) |       | (1.34-15.63) | (96.1%)  |       | (1.48-9.73) | (73.38%) |       |

age G1: ≤35 years, G2: between 36-50 and G3: ≥ 51; p-value\*- test V-square, p-value\*\* test Chi² with Yates correction

**Table S3.** Method of registration for vaccination in pharmacies in relation to basic characteristics of participants.

| How to register for vaccination at the pharmacy |       |                                      |                   |                                           |                 |
|-------------------------------------------------|-------|--------------------------------------|-------------------|-------------------------------------------|-----------------|
|                                                 | Total | by e-registration.<br>patient gov.pl | 24/7 helpline 989 | personally or by phone at<br>the pharmacy | <i>p</i> -value |
| Sex                                             |       |                                      |                   |                                           |                 |
| Female                                          | 226   | 99 (43.81%)                          | 29 (12.83%)       | 98 (43.36%)                               | 0.283           |
| Male                                            | 172   | 64 (37.21%)                          | 30 (17.44%)       | 78 (45.35%)                               |                 |
| Age                                             |       |                                      |                   |                                           |                 |
| G1                                              | 171   | 104 (60.82%)                         | 19 (11.11%)       | 48 (28.07%)                               | 0.000           |
| G2                                              | 120   | 45 (37.5%)                           | 23 (19.17%)       | 52 (43.33%)                               |                 |
| G3                                              | 107   | 14 (13.08%)                          | 17 (15.89%)       | 76 (71.03%)                               |                 |
| Place of residence                              |       |                                      |                   |                                           |                 |
| city above 100.000                              | 206   | 103 (50.24%)                         | 26 (12.68%)       | 76 (37.07%)                               | 0.002           |
| city of less than 100.000                       | 143   | 43 (30.07%)                          | 22 (15.38%)       | 78 (54.55%)                               |                 |
| rural                                           | 49    | 17 (34.69%)                          | 11 (22.45%)       | 21 (42.86%)                               |                 |
| Education                                       |       |                                      |                   |                                           |                 |
| Higher                                          | 162   | 90 (55.56%)                          | 16 (9.88%)        | 56 (34.57%)                               | 0.000           |
| Secondary general                               | 162   | 60 (37.04%)                          | 29 (17.9%)        | 73 (45.06%)                               |                 |
| Secondary vocational                            | 50    | 11 (22%)                             | 5 (10%)           | 34 (68%)                                  |                 |
| Primary                                         | 24    | 2 (8.33%)                            | 9 (37.5%)         | 13 (54.17%)                               |                 |
| Vaccine dose                                    |       |                                      |                   |                                           |                 |
| 1st                                             | 30    | 13 (43.33%)                          | 7 (23.33%)        | 10 (33.33%)                               | 0.292           |
| 2nd                                             | 60    | 19 (31.67%)                          | 10 (16.67%)       | 31 (51.67%)                               |                 |
| 3rd                                             | 308   | 131 (42.53%)                         | 42 (13.64%)       | 135 (43.83%)                              |                 |

age G1: ≤35 years, G2: between 36-50 and G3: ≥ 51

**Table S4.** Opinions regarding experiences of immunization against COVID-19 at the pharmacy in relation to basic characteristics of participants.

| Experience with           | the interview prior to vaccination |              |                 |                  | with the information received prior to vaccination |                 |                  | the technique of vaccination |                 |                   | with the premises organized for vaccination |                 |          | the post-vaccination care in the pharmacy |                 |                  |
|---------------------------|------------------------------------|--------------|-----------------|------------------|----------------------------------------------------|-----------------|------------------|------------------------------|-----------------|-------------------|---------------------------------------------|-----------------|----------|-------------------------------------------|-----------------|------------------|
|                           | Total                              | Yes          | <i>p</i> -value | OR 95%CI         | Yes                                                | <i>p</i> -value | OR 95%CI         | Yes                          | <i>p</i> -value | OR 95%CI          | Yes                                         | <i>p</i> -value | OR 95%CI | Yes                                       | <i>p</i> -value | OR 95%CI         |
| Sex                       |                                    |              |                 |                  |                                                    |                 |                  |                              |                 |                   |                                             |                 |          |                                           |                 |                  |
| Female                    | 226                                | 208 (92.04%) | 0.503           | -                | 216 (95.58%)                                       | 0.0007          | 3.5 (1.63-7.54)  | 222 (98.23%)                 | 0.054*          | 3.06 (0.93-10.12) | 214 (94.60%)                                | 0.766*          | -        | 204 (90.27%)                              | 0.073           | -                |
| Male                      | 172                                | 155 (90.12%) |                 |                  | 148 (86.05%)                                       |                 | ref.             | 163 (94.77%)                 |                 | ref.              | 164 (95.35%)                                |                 |          | 145 (84.30%)                              |                 |                  |
| Age                       |                                    |              |                 |                  |                                                    |                 |                  |                              |                 |                   |                                             |                 |          |                                           |                 |                  |
| G1                        | 171                                | 152 (88.89%) |                 |                  | 158 (92.4%)                                        |                 |                  | 170 (99.42%)                 |                 | 10.1 (1.19-85.1)  | 163 (95.32%)                                |                 |          | 162 (94.74%)                              |                 | 4.5 (2-10.08)    |
| G2                        | 120                                | 113 (94.17%) | 0.290           | -                | 109 (90.83%)                                       | 0.843           | -                | 114 (95%)                    | 0.032           | 1.13 (0.35-3.61)  | 114 (95%)                                   | 0.942           | -        | 96 (80%)                                  | 0.0005          | ref.             |
| G3                        | 107                                | 98 (91.59%)  |                 |                  | 97 (90.65%)                                        |                 |                  | 101 (94.39%)                 |                 | ref.              | 101 (94.39%)                                |                 |          | 91 (85.05%)                               |                 | 1.42 (0.71-2.85) |
| Place of residence        |                                    |              |                 |                  |                                                    |                 |                  |                              |                 |                   |                                             |                 |          |                                           |                 |                  |
| city above 100.000        | 206                                | 181 (88.29%) |                 | ref.             | 191 (93.17%)                                       |                 |                  | 201 (98.05%)                 |                 | 7.01 (1.89-25.92) | 195 (95.12%)                                |                 |          | 189 (92.2%)                               |                 | 2.88 (1.49-5.54) |
| city of less than 100.000 | 143                                | 137 (95.8%)  | 0.048           | 3.03 (1.2-7.71)  | 129 (90.21%)                                       | 0.384           | -                | 140 (97.9%)                  | 0.0008          | 6.51 (1.56-27.14) | 137 (95.8%)                                 | 0.542           | -        | 115 (80.42%)                              | 0.004           | ref.             |
| rural                     | 49                                 | 44 (89.8%)   |                 | 1.16 (0.42-3.23) | 43 (87.76%)                                        |                 |                  | 43 (87.76%)                  |                 | ref.              | 45 (91.84%)                                 |                 |          | 44 (89.8%)                                |                 | 2.14 (0.78-5.9)  |
| Education                 |                                    |              |                 |                  |                                                    |                 |                  |                              |                 |                   |                                             |                 |          |                                           |                 |                  |
| Higher                    | 162                                | 153 (94.44%) | 0.295           | -                | 152 (93.83%)                                       | 0.021           | 2.39 (1.09-5.22) | 157 (96.91%)                 | 0.267           | -                 | 154 (95.06%)                                | 0.986           | -        | 149 (91.98%)                              | 0.015           | 2.39 (1.19-4.81) |
| Secondary                 |                                    | 144          |                 |                  | 140                                                |                 |                  | 154                          |                 |                   | 154                                         |                 |          | 134                                       |                 |                  |
| general                   | 162                                | (88.89%)     |                 |                  | (86.42%)                                           |                 | ref.             | (95.06%)                     |                 |                   | (95.06%)                                    |                 |          | (82.72%)                                  |                 | ref.             |

|                                                                                                                       |     |            |  |                     |  |              |  |          |  |               |  |          |  |                            |  |
|-----------------------------------------------------------------------------------------------------------------------|-----|------------|--|---------------------|--|--------------|--|----------|--|---------------|--|----------|--|----------------------------|--|
| Secondary                                                                                                             |     |            |  | 7.7                 |  | 50           |  |          |  |               |  | 1.09     |  |                            |  |
| vocational                                                                                                            | 50  | 45 (90%)   |  | 49 (98%)            |  | (1.01-58.64) |  | (100%)   |  | 47 (94%)      |  | 42 (84%) |  | (0.46-2.59)                |  |
|                                                                                                                       |     |            |  | 23                  |  | 3.61         |  | 24       |  | 23            |  | 24       |  |                            |  |
| Primary                                                                                                               | 24  | 21 (87.5%) |  | (95.83%)            |  | (0.46-28.13) |  | (100%)   |  | (95.83%)      |  | (100%)   |  | -                          |  |
| Vaccine dose                                                                                                          |     |            |  |                     |  |              |  |          |  |               |  |          |  |                            |  |
|                                                                                                                       |     |            |  | ref.                |  | 28           |  | 25       |  | 26            |  | 26       |  |                            |  |
| 1st                                                                                                                   | 30  | 24 (80%)   |  | (93.33%)            |  |              |  | (83.33%) |  | ref.          |  | (86.67%) |  | ref. (86.67%)              |  |
|                                                                                                                       |     |            |  | 0.0001              |  | ref.         |  | 59       |  | 11.8          |  | 52       |  | 55                         |  |
| 2nd                                                                                                                   | 60  | 48 (80%)   |  | 54 (90%)            |  | 0.859        |  | -        |  | (1.31-106.21) |  | (86.67%) |  | 0.0002 ref. (91.67%) 0.595 |  |
|                                                                                                                       |     | 291        |  | 4.28 (              |  | 281          |  | 301      |  | 4.28          |  | 300      |  | 5.77 268                   |  |
| 3rd                                                                                                                   | 308 | (94.48%)   |  | 1.92-9.52) (91.56%) |  |              |  | (97.73%) |  | (1.54-11.86)  |  | (97.4%)  |  | (1.63-20.45) (87.01%)      |  |
| age G1: ≤35 years, G2: between 36-50 and G3: ≥ 51; p-value*- test V-square, p-value** test Chi2 with Yates correction |     |            |  |                     |  |              |  |          |  |               |  |          |  |                            |  |



**Table S5.** Opinions regarding satisfaction with immunization at the pharmacy in relation to basic characteristics of participants.

| Satisfaction with         | safe during the vaccination procedure |            |                 |          | pharmacists are competent to vaccinate |                 |             | satisfaction with vaccination in the pharmacy |                 |          | further vaccinations at the pharmacy |                 |              |          |          |          |          |             |
|---------------------------|---------------------------------------|------------|-----------------|----------|----------------------------------------|-----------------|-------------|-----------------------------------------------|-----------------|----------|--------------------------------------|-----------------|--------------|----------|----------|----------|----------|-------------|
|                           | Total                                 | Yes        | <i>p</i> -value | OR 95%CI | Yes                                    | <i>p</i> -value | OR 95%CI    | Yes                                           | <i>p</i> -value | OR 95%CI | Yes                                  | <i>p</i> -value | OR 95%CI     |          |          |          |          |             |
| Sex                       |                                       |            |                 |          |                                        |                 |             |                                               |                 |          |                                      |                 |              |          |          |          |          |             |
|                           |                                       | 224        |                 |          | 210                                    |                 | 2.03        | 214                                           |                 |          | 202                                  |                 |              |          |          |          |          |             |
| Female                    | 226                                   | (99.12%)   | 0.451**         | -        | (92.92%)                               | 0.036           | (1.03-3.97) | (94.69%)                                      | 0.828*          | -        | (89.38%)                             | 0.619           | -            |          |          |          |          |             |
| Male                      | 172                                   | 168        |                 |          | (97.67%)                               |                 | 149         | (86.83%)                                      |                 |          | Ref                                  |                 |              | 163      | (94.77%) | 151      | (87.79%) |             |
| Age                       |                                       |            |                 |          |                                        |                 |             |                                               |                 |          |                                      |                 |              |          |          |          |          |             |
|                           |                                       | 170        |                 |          | 162                                    |                 | 2.77        | 163                                           |                 |          | 156                                  |                 |              |          |          |          |          |             |
| G1                        | 171                                   | (99.42%)   | 0.392           | -        | (94.74%)                               | 0.031           | (1.18-6.5)  | (95.32%)                                      | 0.791           | -        | (91.23%)                             | 0.282           | -            |          |          |          |          |             |
| G2                        | 120                                   | 117        |                 |          | (97.5%)                                |                 | 104         | (86.67%)                                      |                 |          | ref.                                 |                 |              | 113      | (94.17%) | 106      | (88.33%) |             |
|                           |                                       | 105        |                 |          |                                        |                 | 93          |                                               |                 |          | 1.02                                 |                 |              | 100      |          |          |          |             |
| G3                        | 107                                   | (98.13%)   |                 |          | (86.92%)                               |                 | (0.47-2.21) | (93.46%)                                      |                 |          | 91 (85.05%)                          |                 |              |          |          |          |          |             |
| Place of residence        |                                       |            |                 |          |                                        |                 |             |                                               |                 |          |                                      |                 |              |          |          |          |          |             |
| city above 100.000        | 206                                   | 200        | 0.176           | -        | 186                                    | 0.533           | -           | 192                                           | 0.114           | -        | 182                                  | 0.699           | -            |          |          |          |          |             |
| city of less than 100.000 | 143                                   | 143 (100%) |                 |          | 130                                    |                 |             | (90.91%)                                      |                 |          | 139                                  |                 |              | (97.02%) | 125      | (87.41%) |          |             |
|                           |                                       | 48         |                 |          |                                        |                 |             | 42                                            |                 |          |                                      |                 |              |          |          |          |          |             |
| rural                     | 49                                    | (97.96%)   |                 |          | (85.71%)                               |                 |             | 44 (89.8%)                                    |                 |          | 45 (91.84%)                          |                 |              |          |          |          |          |             |
| Education                 |                                       |            |                 |          |                                        |                 |             |                                               |                 |          |                                      |                 |              |          |          |          |          |             |
|                           |                                       |            | 0.031           | -        | 148                                    | 0.869           | -           | 151                                           | 0.823           | -        | 152                                  | 0.034           | 3.04         |          |          |          |          |             |
| Higher                    | 162                                   | 162 (100%) |                 |          | (91.36%)                               |                 |             | (93.21%)                                      |                 |          | (93.83%)                             |                 | (0.87-10.61) |          |          |          |          |             |
| Secondary general         | 162                                   | 156        |                 |          | (96.3%)                                |                 |             | 146                                           |                 |          | (90.12%)                             |                 | 154          | (95.06%) | 136      | (83.95%) | 1.05     | (0.33-3.31) |
| Secondary vocational      | 50                                    | 50 (100%)  |                 |          |                                        |                 |             | 44 (88%)                                      |                 |          |                                      |                 | 48 (96%)     |          | 45 (90%) |          | 1.8      | (0.44-7.42) |

|              |     |                 |       |                 |                 |                 |       |
|--------------|-----|-----------------|-------|-----------------|-----------------|-----------------|-------|
| Primary      | 24  | 24 (100%)       | -     | 21<br>(87.5%)   | 23<br>(95.83%)  | 20 (83.33%)     | ref.  |
| Vaccine dose |     |                 |       |                 |                 |                 |       |
| 1st          | 30  | 30 (100%)       |       | 24 (80%)        | 28<br>(93.33%)  | 25 (83.33%)     |       |
| 2nd          | 60  | 59<br>(98.33%)  | 0.779 | -               | 54 (90%)        | 50 (83.33%)     | 0.189 |
| 3rd          | 308 | 303<br>(98.38%) |       | 281<br>(91.56%) | 294<br>(95.45%) | 278<br>(90.26%) |       |

Age G1: ≤35 years, G2: between 36-50 and G3: ≥ 51; p-value\*- test V-square, p-value\*\* test Chi<sup>2</sup> with Yates correction

**Table S6.** Attitude to the expansion of pharmacy services in relation to basic characteristics of participants.

|                                |          | Sex          |               | Age         |                     |                    | Place of residence |                           |             | Education |                     |                      | Vaccine dose         |             |                     |                  |
|--------------------------------|----------|--------------|---------------|-------------|---------------------|--------------------|--------------------|---------------------------|-------------|-----------|---------------------|----------------------|----------------------|-------------|---------------------|------------------|
| Type of services               |          | Female       | Male          | G1          | G2                  | G3                 | city above 100.000 | city of less than 100.000 | Rural       | Higher    | Secondary general   | Secondary vocational | Primary              | 1st         | 2nd                 | 3rd              |
| Blood pressure control         | Total    | 210          | 163           | 159         | 119                 | 95                 | 189                | 138                       | 46          | 154       | 152                 | 45                   | 22                   | 29          | 52                  | 292              |
|                                |          |              |               | 131         | 110                 |                    | 167                |                           |             | 141       | 124                 |                      |                      |             |                     | 255              |
|                                | Yes      | 185 (88.1%)  | 138 (84.66 %) | (82.39%)    | (92.44%)            | 82 (86.32%)        | (88.36%)           | 118 (85.51%)              | 38 (82.61%) | (91.56%)  | (81.58%)            | 39 (86.67%)          | 19 (86.36%)          | 23 (79.31%) | 45 (86.54%)         | (87.33%)         |
|                                | p-value  | 0.334        |               |             | 0.052               |                    |                    | 0.528                     |             |           | 0.087               |                      |                      | 0.481       |                     |                  |
|                                | OR 95%CI | -            |               |             | -                   |                    |                    | -                         |             |           | -                   |                      |                      | -           |                     |                  |
| Glucose control                | Total    | 210          | 162           | 160         | 117                 | 95                 | 190                | 136                       | 46          | 154       | 153                 | 44                   | 21                   | 29          | 52                  | 291              |
|                                |          |              |               |             | 108                 |                    | 164                |                           |             | 137       | 128                 |                      |                      |             |                     | 255              |
|                                | Yes      | 182 (86.67%) | 140 (86.42 %) | 132 (82.5%) | (91.45%)            | 83 (87.37%)        | (86.32%)           | 120 (88.24%)              | 38 (82.61%) | (88.96%)  | (83.66%)            | 39 (86.64%)          | 18 (85.71%)          | 23 (79.31%) | 44 (84.62%)         | (87.63%)         |
|                                | p-value  | 0.945        |               |             | 0.094               |                    |                    | 0.620                     |             |           | 0.563               |                      |                      | 0.414       |                     |                  |
|                                | OR 95%CI | -            |               |             | -                   |                    |                    | -                         |             |           | -                   |                      |                      | -           |                     |                  |
| BMI calculation                | Total    | 209          | 162           | 159         | 117                 | 95                 | 189                | 135                       | 47          | 152       | 151                 | 45                   | 23                   | 29          | 52                  | 290              |
|                                |          |              |               |             |                     |                    | 140                |                           |             | 123       | 104                 |                      |                      |             |                     | 226              |
|                                | Yes      | 164 (78.47%) | 117 (72.22 %) | 114 (71.7%) | 97 (82.91%)         | 70 (73.68%)        | (74.07%)           | 104 (77.04%)              | 37 (78.72%) | (80.92%)  | (68.87%)            | 33 (73.33%)          | 21 (91.3%)           | 19 (65.52%) | 36 (69.23%)         | (77.93%)         |
|                                | p-value  | 0.164        |               |             | 0.086               |                    |                    | 0.727                     |             |           | 0.026               |                      |                      | 0.165       |                     |                  |
|                                | OR 95%CI | -            |               |             | -                   |                    |                    | -                         |             |           | 1.92<br>(1.13-3.26) | ref.<br>(0.59-2.62)  | 4.74<br>(1.06-21.07) | -           |                     |                  |
| Advice about specialized diets | Total    | 207          | 162           | 160         | 114                 | 95                 | 189                | 134                       | 46          | 152       | 150                 | 45                   | 22                   | 29          | 53                  | 287              |
|                                |          |              |               | 109         |                     |                    | 143                |                           |             | 117       | 103                 |                      |                      |             |                     | 219              |
|                                | Yes      | 149 (71.98%) | 127 (78.4 %)  | (68.13%)    | 96 (84.21%)         | 71 (74.74%)        | (75.66%)           | 103 (76.87%)              | 30 (65.22%) | (76.97%)  | (68.67%)            | 36 (80%)             | 20 (90.91%)          | 15 (51.72%) | 42 (79.25%)         | (76.31%)         |
|                                | p-value  | 0.159        |               |             | 0.010               |                    |                    | 0.270                     |             |           | 0.070               |                      |                      | 0.011       |                     |                  |
|                                | OR 95%CI | -            |               |             | ref.<br>(1.36-4.56) | 2.5<br>(0.78-2.45) | 1.38               | -                         |             |           | -                   |                      |                      | ref.        | 3.56<br>(1.33-9.55) | 3<br>(1.38-6.54) |
| Use medical equipment          | Total    | 202          | 160           | 155         | 113                 | 94                 | 182                | 134                       | 46          | 147       | 149                 | 45                   | 21                   | 29          | 53                  | 280              |
|                                |          |              |               | 122         |                     |                    | 146                |                           |             | 123       |                     |                      |                      |             |                     | 230              |
|                                | Yes      | 171 (84.65%) | 117 (73.13 %) | (78.71%)    | 91 (80.53%)         | 75 (79.79%)        | (80.22%)           | 104 (77.61%)              | 38 (82.61%) | (83.67%)  | 111 (74.5%)         | 35 (77.78%)          | 19 (90.48%)          | 21 (72.41%) | 37 (69.81%)         | (82.14%)         |
|                                | p-value  | 0.007        |               |             | 0.934               |                    |                    | 0.732                     |             |           | 0.138               |                      |                      | 0.076       |                     |                  |
|                                | OR 95%CI | 2.03         | ref.          | -           |                     |                    | -                  |                           |             | -         |                     |                      | -                    |             |                     |                  |
| Control of quitting smoking    | Total    | 197          | 157           | 154         | 111                 | 89                 | 181                | 129                       | 44          | 145       | 145                 | 44                   | 20                   | 29          | 51                  | 274              |
|                                |          |              |               |             |                     |                    | 108                |                           |             |           |                     |                      |                      |             |                     | 164              |
|                                | Yes      | 113 (57.36%) | 93 (59.24 %)  | 85 (55.19%) | 73 (65.77%)         | 48 (53.93%)        | (59.67%)           | 71 (55.05%)               | 27 (61.36%) | 87 (60%)  | 76 (52.41%)         | 27 (61.36%)          | 16 (80%)             | 13 (44.83%) | 29 (56.86%)         | (59.85%)         |
|                                | p-value  | 0.722        |               |             | 0.146               |                    |                    | 0.647                     |             |           | 0.099               |                      |                      | 0.289       |                     |                  |

|                                                      |          |              |              |          |             |             |             |              |             |                     |             |                     |                      |             |             |          |
|------------------------------------------------------|----------|--------------|--------------|----------|-------------|-------------|-------------|--------------|-------------|---------------------|-------------|---------------------|----------------------|-------------|-------------|----------|
|                                                      | OR 95%CI | -            | -            | -        | -           | -           | -           | -            | -           | -                   | -           | -                   | -                    | -           | -           | -        |
| Continuation of ongoing prescriptions by pharmacists | Total    | 209          | 159          | 160      | 113         | 95          | 186         | 136          | 46          | 154                 | 149         | 45                  | 20                   | 29          | 54          | 285      |
|                                                      |          |              |              | 143      | 101         |             | 175         |              |             | 138                 | 133         |                     |                      |             |             | 259      |
|                                                      | Yes      | 188 (89.95%) | 142 (89.31%) | (89.38%) | (89.38%)    | 86 (90.53%) | (94.09%)    | 117 (86.03%) | 38 (82.61%) | (89.61%)            | (89.26%)    | 41 (91.11%)         | 18 (90%)             | 24 (82.76%) | 47 (87.04%) | (90.88%) |
|                                                      | p-value  | 0.841        |              |          | 0.951       |             |             | 0.015        |             |                     | 0.988       |                     |                      |             | 0.309       |          |
|                                                      | OR 95%CI | -            | -            | -        | -           | -           | (1.26-8.89) | (0.52-3.2)   | ref.        | -                   | -           | -                   | -                    | -           | -           | -        |
| Monitoring of the therapy with newly drugs           | Total    | 201          | 179          | 156      | 111         | 91          | 183         | 130          | 45          | 148                 | 146         | 44                  | 20                   | 29          | 53          | 276      |
|                                                      |          |              |              | 113      |             |             |             |              |             | 116                 |             |                     |                      |             |             | 199      |
|                                                      | Yes      | 149 (74.13%) | 112 (71.34%) | (72.44%) | 84 (75.68%) | 64 (70.33%) | 140 (76.5%) | 90 (69.23%)  | 31 (68.89%) | (78.38%)            | 95 (65.07%) | 33 (75%)            | 17 (85%)             | 23 (79.31%) | 39 (73.58%) | (72.1%)  |
|                                                      | p-value  | 0.555        |              |          | 0.686       |             |             | 0.293        |             |                     | 0.039       |                     |                      |             | 0.703       |          |
|                                                      | OR 95%CI | -            | -            | -        | -           | -           | -           | -            | -           | 1.94<br>(1.15-3.27) | ref.        | 1.61<br>(0.75-3.45) | 3.04<br>(0.85-10.87) | -           | -           | -        |

Age- G1: ≤35 years, G2: between 36-50 and G3: ≥ 51
